# Supplementary material for: Dicer and microRNAs protect adult dopamine neurons
Source: PubMed Central journal article supplement (PMC5520729; doi:10.1038/cddis.2017.214), 2017-05-25
Supplement: cddis2017214x1.pdf [file cddis2017214x1.pdf]

## **Dicer and microRNAs protect adult dopamine neurons**

Running title: **Dicer protects dopamine neurons**

Piotr Chmielarz<sup>1,2</sup>, Julia Konovalova<sup>1</sup>, Syeda Sadia Najam<sup>3</sup>, Heike Alter<sup>4</sup>, Timo Petteri Piepponen<sup>5</sup>, Holger Erfle<sup>6</sup>, Kai C. Sonntag<sup>7</sup>, Günther Schütz<sup>4</sup>, Ilya A. Vinnikov<sup>3,4,¶,\*</sup>, Andrii Domanskyi<sup>1,4,¶,\*</sup>

<sup>1</sup> Institute of Biotechnology, P.O. Box 56, University of Helsinki, Helsinki 00014, Finland

<sup>2</sup> Institute of Pharmacology, Polish Academy of Sciences, Department of Brain Biochemistry, 31-343 Krakow, Smetna street 12, Poland

<sup>3</sup> Laboratory of Molecular Neurobiology, Sheng Yushou Center of Cell Biology and Immunology, School of Life Sciences and Biotechnology, Shanghai Jiao Tong University, 800 Dongchuan Road, 200240 Shanghai, China

<sup>4</sup> Molecular Biology of the Cell I Division, German Cancer Research Center, Im Neuenheimer Feld 280, Heidelberg 69120, Germany

<sup>5</sup> Division of Pharmacology and Pharmacotherapy, P.O. Box 56, University of Helsinki, Helsinki 00014, Finland

<sup>6</sup> ViroQuant-CellNetworks RNAi Screening Facility, BioQuant, Im Neuenheimer Feld 267, Heidelberg University, Heidelberg 69120, Germany

<sup>7</sup> Department of Psychiatry, McLean Hospital, Harvard Medical School, 115 Mill Street, Belmont, MA 02478, USA

¶ I.A.V. and A.D. contributed equally to this work.

\* Corresponding authors

Ilya A. Vinnikov, [ilya.vinnikov@gmail.com](mailto:ilya.vinnikov@gmail.com), Andrii Domanskyi, [andrii.domanskyi@helsinki.fi](mailto:andrii.domanskyi@helsinki.fi)

# SUPPLEMENTAL FIGURES AND TABLES

**Table S1. MicroRNAs exhibiting statistically significant changes in microdissected DA neurons from old vs. young mice**

| p           | comparison  | ratio       | 95% ci low  | 95% ci high | Normalized Cq values |          |          |          |          |          |          |          |          |          |          |          |  |  |  |
|-------------|-------------|-------------|-------------|-------------|----------------------|----------|----------|----------|----------|----------|----------|----------|----------|----------|----------|----------|--|--|--|
|             |             |             |             |             | Young mice           |          |          |          |          |          |          | Old mice |          |          |          |          |  |  |  |
|             |             |             |             |             | y1                   | y2       | y3       | y4       | y5       | y6       | y7       | o1       | o2       | o3       | o4       | o5       |  |  |  |
| 0.017676768 | old / young | 0.225004479 | 0.078117461 | 0.648088335 | 29.17397             | 30.75683 | 28.71133 | 28.59265 | 27.88514 | 28.57092 | 29.1365  | 32.39091 | 30.38667 | 32.78864 | 30.92776 | 29.14397 |  |  |  |
| 0.047979798 | old / young | 0.244265433 | 0.064654982 | 0.922830699 | 26.07443             | 25.63105 | 25.90748 | 25.80598 | 25.70147 | 28.22526 | 25.34639 | 25.85638 | 26.04642 | 29.56816 | 29.86222 | 29.32855 |  |  |  |
| 0.010101010 | old / young | 0.269117467 | 0.102523447 | 0.706416075 | 27.6019              | 28.66463 | 29.56546 | 29.46131 | 28.07038 | 29.29691 | 28.65564 | 32.26029 | 32.15253 | 29.42647 | 29.81319 | 29.6133  |  |  |  |
| 0.010101010 | old / young | 0.288619226 | 0.112955697 | 0.737466631 | 31.13808             | 29.90221 | 31.13236 | 30.25739 | 30.05268 | 32.14366 | 30.49845 | 34.40295 | 31.17499 | 32.71478 | 32.99353 | 31.33814 |  |  |  |
| 0.047979798 | old / young | 0.294965152 | 0.099870105 | 0.871176025 | 30.43193             | 29.56285 | 30.40986 | 31.11932 | 29.92483 | 31.78267 | 28.87659 | 32.31794 | 30.17727 | 34.24456 | 32.10199 | 31.4709  |  |  |  |
| 0.017676768 | old / young | 0.302021609 | 0.105057464 | 0.868258651 | 31.17604             | 30.77286 | 29.85826 | 30.34973 | 31.77649 | 31.54064 | 30.82247 | 33.29693 | 35.2331  | 31.24781 | 31.56274 | 31.79329 |  |  |  |
| 0.002525253 | old / young | 0.343624116 | 0.205411427 | 0.574834296 | 30.15714             | 30.10649 | 29.42224 | 29.40018 | 30.16515 | 30.03877 | 28.95118 | 31.61559 | 30.28793 | 31.989   | 31.61131 | 30.94533 |  |  |  |
| 0.047979798 | old / young | 0.388090946 | 0.17563278  | 0.85755394  | 26.42761             | 24.69019 | 25.38174 | 27.42606 | 26.55159 | 26.81359 | 26.5842  | 27.46375 | 26.52842 | 27.34597 | 28.32894 | 28.49985 |  |  |  |
| 0.017676768 | old / young | 0.39170912  | 0.206062644 | 0.744608687 | 29.75237             | 31.0145  | 29.91448 | 30.15404 | 30.19808 | 30.96325 | 30.25624 | 30.23131 | 31.24914 | 32.58887 | 31.97229 | 32.32837 |  |  |  |
| 0.047979798 | old / young | 0.398594114 | 0.141309472 | 1.124321428 | 29.09262             | 28.55411 | 29.28782 | 29.32206 | 29.06797 | 28.56732 | 29.05186 | 33.32995 | 30.21306 | 29.93891 | 29.33196 | 28.78099 |  |  |  |
| 0.030303030 | old / young | 0.426255647 | 0.252354821 | 0.838628117 | 29.98941             | 29.41475 | 29.31775 | 29.81828 | 30.15746 | 31.0144  | 30.34313 | 30.30287 | 29.89483 | 31.78602 | 31.80718 | 31.68528 |  |  |  |
| 0.002525253 | old / young | 0.430880669 | 0.272009462 | 0.682542988 | 28.14356             | 28.85748 | 28.40377 | 28.47875 | 28.38489 | 29.08221 | 27.45199 | 29.48134 | 30.25753 | 29.25851 | 29.10738 | 29.97032 |  |  |  |
| 0.047979798 | old / young | 0.441070156 | 0.203901878 | 0.954100495 | 29.21516             | 29.1556  | 30.15013 | 30.31257 | 28.97115 | 29.70526 | 28.80289 | 29.36187 | 29.98697 | 30.73141 | 30.78866 | 32.40194 |  |  |  |
| 0.030303030 | old / young | 0.503783227 | 0.252354821 | 1.005717027 | 30.33429             | 30.76348 | 30.31317 | 29.68127 | 31.42555 | 30.36162 | 30.25081 | 33.22933 | 31.24238 | 30.99534 | 30.79936 | 30.91538 |  |  |  |
| 0.002525253 | old / young | 0.518421078 | 0.365627231 | 0.735066733 | 28.20392             | 28.20661 | 27.48309 | 27.89607 | 27.71517 | 27.36761 | 27.89196 | 28.4852  | 28.45433 | 29.39092 | 29.1422  | 28.38382 |  |  |  |
| 0.030303030 | old / young | 0.529842376 | 0.344750971 | 0.814306462 | 28.80794             | 29.67138 | 29.05812 | 29.50315 | 29.21888 | 29.05306 | 29.51343 | 30.20844 | 29.11825 | 30.15853 | 30.7549  | 30.64596 |  |  |  |
| 0.017676768 | old / young | 0.566872121 | 0.376671197 | 0.855386317 | 27.4694              | 27.23939 | 28.01037 | 27.64003 | 28.13734 | 27.94862 | 27.33014 | 27.64971 | 28.1997  | 29.05549 | 28.7143  | 28.88623 |  |  |  |
| 0.030303030 | old / young | 0.566874602 | 0.380451542 | 0.844645845 | 27.63256             | 27.95693 | 28.96489 | 28.19054 | 28.17868 | 28.69285 | 28.10563 | 29.59505 | 29.29303 | 28.5776  | 28.67097 | 29.1879  |  |  |  |
| 0.030303030 | old / young | 0.569165732 | 0.360696677 | 0.898122028 | 28.37211             | 27.22265 | 28.14138 | 27.97104 | 27.93031 | 28.3839  | 27.49682 | 28.55022 | 27.93105 | 29.04674 | 29.52645 | 28.66679 |  |  |  |
| 0.010101010 | old / young | 0.586872447 | 0.387781444 | 0.888178829 | 29.339               | 29.65178 | 28.69788 | 29.53123 | 29.32761 | 28.29088 | 29.67501 | 29.54069 | 30.22941 | 29.79173 | 29.98719 | 30.37638 |  |  |  |
| 0.010101010 | old / young | 0.591421219 | 0.409081529 | 0.855035081 | 29.35226             | 29.93518 | 30.07029 | 29.64764 | 29.61548 | 28.92618 | 29.23086 | 30.28577 | 30.75533 | 30.65998 | 30.21811 | 29.65802 |  |  |  |
| 0.010101010 | old / young | 0.592019216 | 0.40226667  | 0.871279558 | 26.31115             | 27.06438 | 27.51747 | 27.38709 | 26.70345 | 26.38503 | 27.05528 | 28.27873 | 27.70569 | 27.44759 | 27.52284 | 27.41505 |  |  |  |
| 0.030303030 | old / young | 0.602883387 | 0.405798022 | 0.895687901 | 29.01117             | 28.21212 | 28.07025 | 28.19373 | 28.42229 | 28.91114 | 28.22586 | 29.35694 | 28.44854 | 29.64107 | 29.57398 | 28.80626 |  |  |  |
| 0.047979798 | old / young | 0.60664697  | 0.351896183 | 1.045821364 | 27.66968             | 27.9131  | 28.39408 | 27.4935  | 27.64428 | 29.08529 | 27.03766 | 29.12954 | 29.12854 | 28.33621 | 28.07013 | 28.96357 |  |  |  |
| 0.030303030 | old / young | 0.609953729 | 0.379160372 | 0.981230052 | 28.51955             | 28.72264 | 29.44719 | 28.73151 | 29.01833 | 28.77334 | 28.8246  | 29.22247 | 28.82837 | 30.72141 | 29.20882 | 29.89734 |  |  |  |
| 0.002525253 | old / young | 0.612381193 | 0.416722879 | 0.899904334 | 27.80893             | 29.0299  | 28.99659 | 28.9054  | 28.85019 | 29.12665 | 28.37004 | 30.04591 | 29.31058 | 29.27865 | 29.23941 | 29.29701 |  |  |  |
| 0.047979798 | old / young | 0.627160248 | 0.425644658 | 0.924080613 | 26.74241             | 27.53088 | 27.23143 | 27.35301 | 26.55752 | 27.24506 | 27.16457 | 27.07722 | 27.71773 | 28.35244 | 27.53656 | 28.27071 |  |  |  |
| 0.002525253 | old / young | 0.633077336 | 0.540494367 | 0.74151913  | 23.35209             | 23.78996 | 23.16046 | 23.27905 | 23.28228 | 23.27347 | 23.54402 | 23.96253 | 23.97509 | 24.00079 | 24.1317  | 24.14286 |  |  |  |
| 0.002525253 | old / young | 0.639578255 | 0.503385407 | 0.812618601 | 28.4054              | 28.31253 | 27.9628  | 27.70531 | 27.84766 | 28.28768 | 28.41395 | 28.55162 | 28.53046 | 28.85364 | 28.98547 | 28.97096 |  |  |  |
| 0.005050505 | old / young | 0.667534594 | 0.533174865 | 0.835752891 | 25.81478             | 26.16276 | 25.43796 | 25.63087 | 25.45509 | 25.74131 | 25.58159 | 25.95002 | 26.19266 | 26.18868 | 26.45616 | 26.57388 |  |  |  |
| 0.010101010 | old / young | 0.693138174 | 0.52875557  | 0.908624997 | 26.32527             | 26.13912 | 26.34066 | 25.87276 | 25.54791 | 26.48656 | 25.99629 | 26.43141 | 26.58911 | 26.83645 | 26.95066 | 26.34241 |  |  |  |
| 0.047979798 | old / young | 0.703669846 | 0.514036982 | 0.963259978 | 22.64535             | 22.93977 | 22.23585 | 22.68935 | 22.80631 | 22.60356 | 22.32613 | 23.24161 | 22.34302 | 23.27808 | 23.55117 | 23.15435 |  |  |  |
| 0.030303030 | old / young | 0.705877569 | 0.561479564 | 0.887411002 | 21.54213             | 21.92743 | 21.5022  | 21.54276 | 21.87907 | 21.56239 | 21.55265 | 21.87093 | 21.74459 | 22.18553 | 22.41094 | 22.521   |  |  |  |
| 0.002525253 | old / young | 0.719741109 | 0.617206528 | 0.839309437 | 25.97525             | 25.67393 | 25.51956 | 25.81675 | 25.96921 | 25.6588  | 25.61746 | 26.11701 | 26.03776 | 26.21079 | 26.44583 | 26.29725 |  |  |  |
| 0.005050505 | old / young | 0.736996898 | 0.596041982 | 0.911285521 | 24.18517             | 24.34882 | 24.32482 | 23.8309  | 24.13773 | 24.49614 | 24.43852 | 24.48941 | 24.56311 | 24.5733  | 25.10943 | 24.72474 |  |  |  |
| 0.030303030 | old / young | 0.742533987 | 0.603780324 | 0.913174378 | 23.82249             | 23.84912 | 23.62819 | 23.37534 | 23.66943 | 23.42235 | 23.60055 | 23.91825 | 23.60931 | 24.25408 | 24.26048 | 24.22486 |  |  |  |
| 0.030303030 | old / young | 0.742945805 | 0.601941786 | 0.916979818 | 26.85787             | 26.74272 | 26.94395 | 27.13775 | 26.63608 | 27.27286 | 26.55999 | 27.20506 | 27.59146 | 27.21732 | 27.135   | 27.38824 |  |  |  |
| 0.017676768 | old / young | 0.755522155 | 0.627445468 | 0.909742369 | 24.77337             | 25.09619 | 25.22899 | 24.86191 | 24.8826  | 25.44298 | 24.97554 | 25.24466 | 25.62452 | 25.39199 | 25.39605 | 25.55191 |  |  |  |
| 0.010101010 | old / young | 0.759907945 | 0.649690783 | 0.888822961 | 22.85817             | 22.80582 | 22.88428 | 22.69297 | 22.76649 | 23.19192 | 22.5829  | 23.27773 | 23.16461 | 23.27424 | 23.38535 | 23.00898 |  |  |  |
| 0.010101010 | old / young | 0.776066106 | 0.649401406 | 0.927436551 | 27.40064             | 27.73153 | 27.24897 | 27.73039 | 27.42226 | 27.53711 | 27.6509  | 27.96199 | 27.65653 | 28.20575 | 27.73262 | 27.93029 |  |  |  |
| 0.010101010 | old / young | 0.779199467 | 0.656390031 | 0.924986335 | 20.56175             | 20.99541 | 20.47519 | 20.62386 | 20.8223  | 20.36399 | 20.91952 | 21.08168 | 20.91553 | 21.11761 | 21.05692 | 21.02939 |  |  |  |
| 0.047979798 | old / young | 0.806115987 | 0.631009965 | 1.029814139 | 25.27442             | 25.224   | 24.95645 | 25.2266  | 25.33019 | 25.24453 | 25.70316 | 26.08102 | 25.51412 | 25.36002 | 25.25078 | 25.74829 |  |  |  |
| 0.017676768 | old / young | 1.373778893 | 1.106006264 | 1.706381336 | 26.77266             | 27.19487 | 26.9511  | 27.06718 | 26.9469  | 26.55127 | 26.8606  | 26.91935 | 26.34522 | 26.19588 | 26.30959 | 26.47105 |  |  |  |
| 0.010101010 | old / young | 1.586050471 | 1.146220727 | 2.194652425 | 27.6397              | 27.83222 | 27.97253 | 27.62337 | 27.16975 | 27.70336 | 27.21425 | 26.24916 | 27.41576 | 26.91337 | 27.15452 | 26.90799 |  |  |  |
| 0.030303030 | old / young | 1.589548298 | 1.125282415 | 2.245359704 | 27.60103             | 28.11436 | 28.6043  | 28.1679  | 28.73181 | 27.60435 | 28.26411 | 27.75823 | 27.79008 | 27.41266 | 27.28165 | 27.19134 |  |  |  |
| 0.047979798 | old / young | 1.954921467 | 0.949134133 | 4.026530929 | 29.66726             | 29.00142 | 29.56488 | 29.59834 | 27.0466  | 29.73501 | 29.1065  | 27.26597 | 28.38082 | 28.37076 | 28.21615 | 28.22904 |  |  |  |
| 0.012121212 | old / young | 2.12522736  | 1.217727653 | 3.70903241  | 32.44917             | 33.78066 | 31.93808 | 32.41661 | 32.31787 | 32.46153 | 33.05983 | NA       | 31.74968 | 31.31349 | 32.10591 | 31.0083  |  |  |  |
| 0.002525253 | old / young | 2.17164921  | 1.655144831 | 2.849333908 | 32.01108             | 31.40004 | 31.91966 | 31.69699 | 31.12637 | 31.70822 | 31.69236 | 30.78157 | 30.04013 | 30.48913 | 30.60993 | 30.73866 |  |  |  |



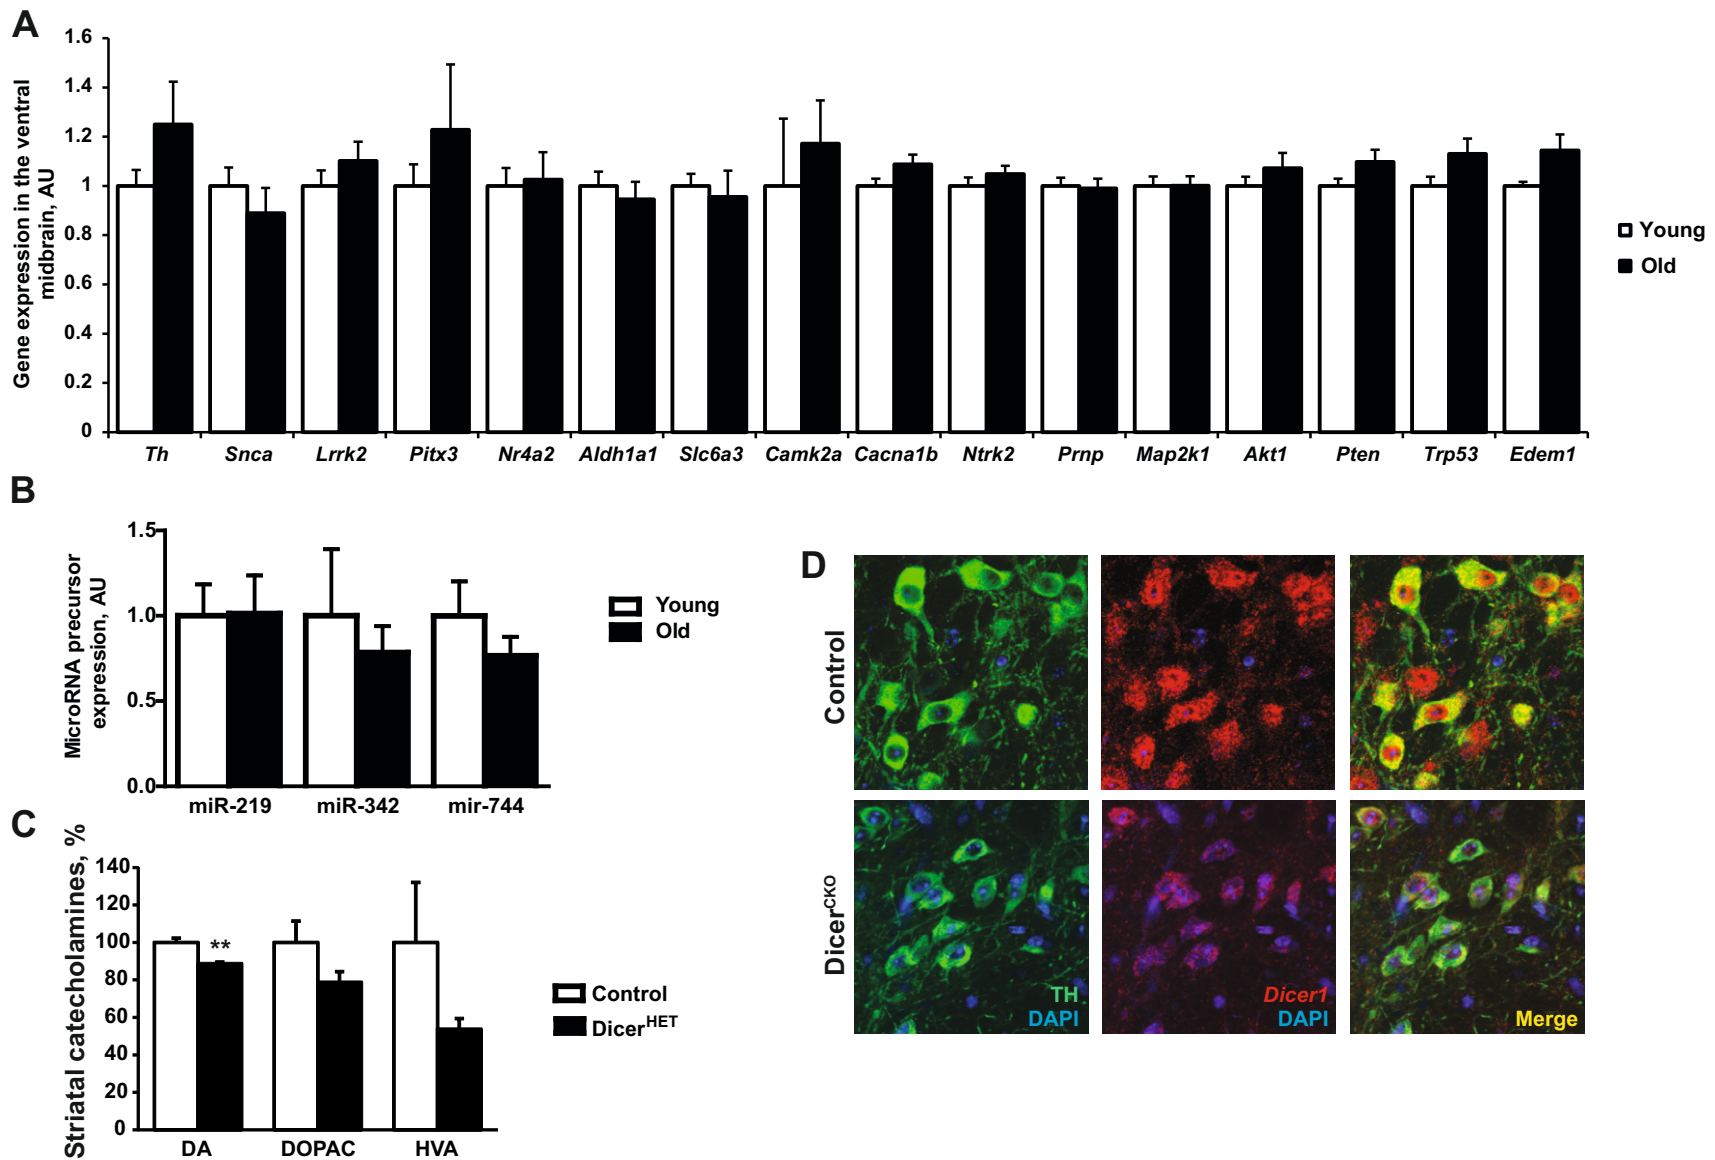

**Fig. S1. Relative expression levels of selected RNAs in the ventral midbrain samples from young and old wild-type mice, quantification of striatal catecholamines in *Dicer*<sup>HET</sup> females, and loss of *Dicer1* mRNA after Tam injections in *Dicer*<sup>CKO</sup> mice (A-B) Quantitative PCR analysis of the expression levels of selected mRNAs (A) and pri-/pre-miRs (B) in the ventral midbrain from young and old wild-type mice. n=6 and 8, respectively. (C) Quantification of striatal content of DA and its derivatives DOPAC and HVA in control and *Dicer*<sup>HET</sup> female mice (n=5 for both groups) 19 weeks after start of tamoxifen (Tam) injections. (D) Loss of *Dicer1* mRNA in DA neurons 2 weeks after start of Tam injections visualized by fluorescent *in situ* hybridization (FISH) with LNA probe (red) and immunofluorescent staining for TH (green). Scale bar, 50  $\mu$ m. \*\*,  $p < 0.01$ ; in comparison to control mice, as determined by Student's unpaired two-tailed  $t$ -test.**

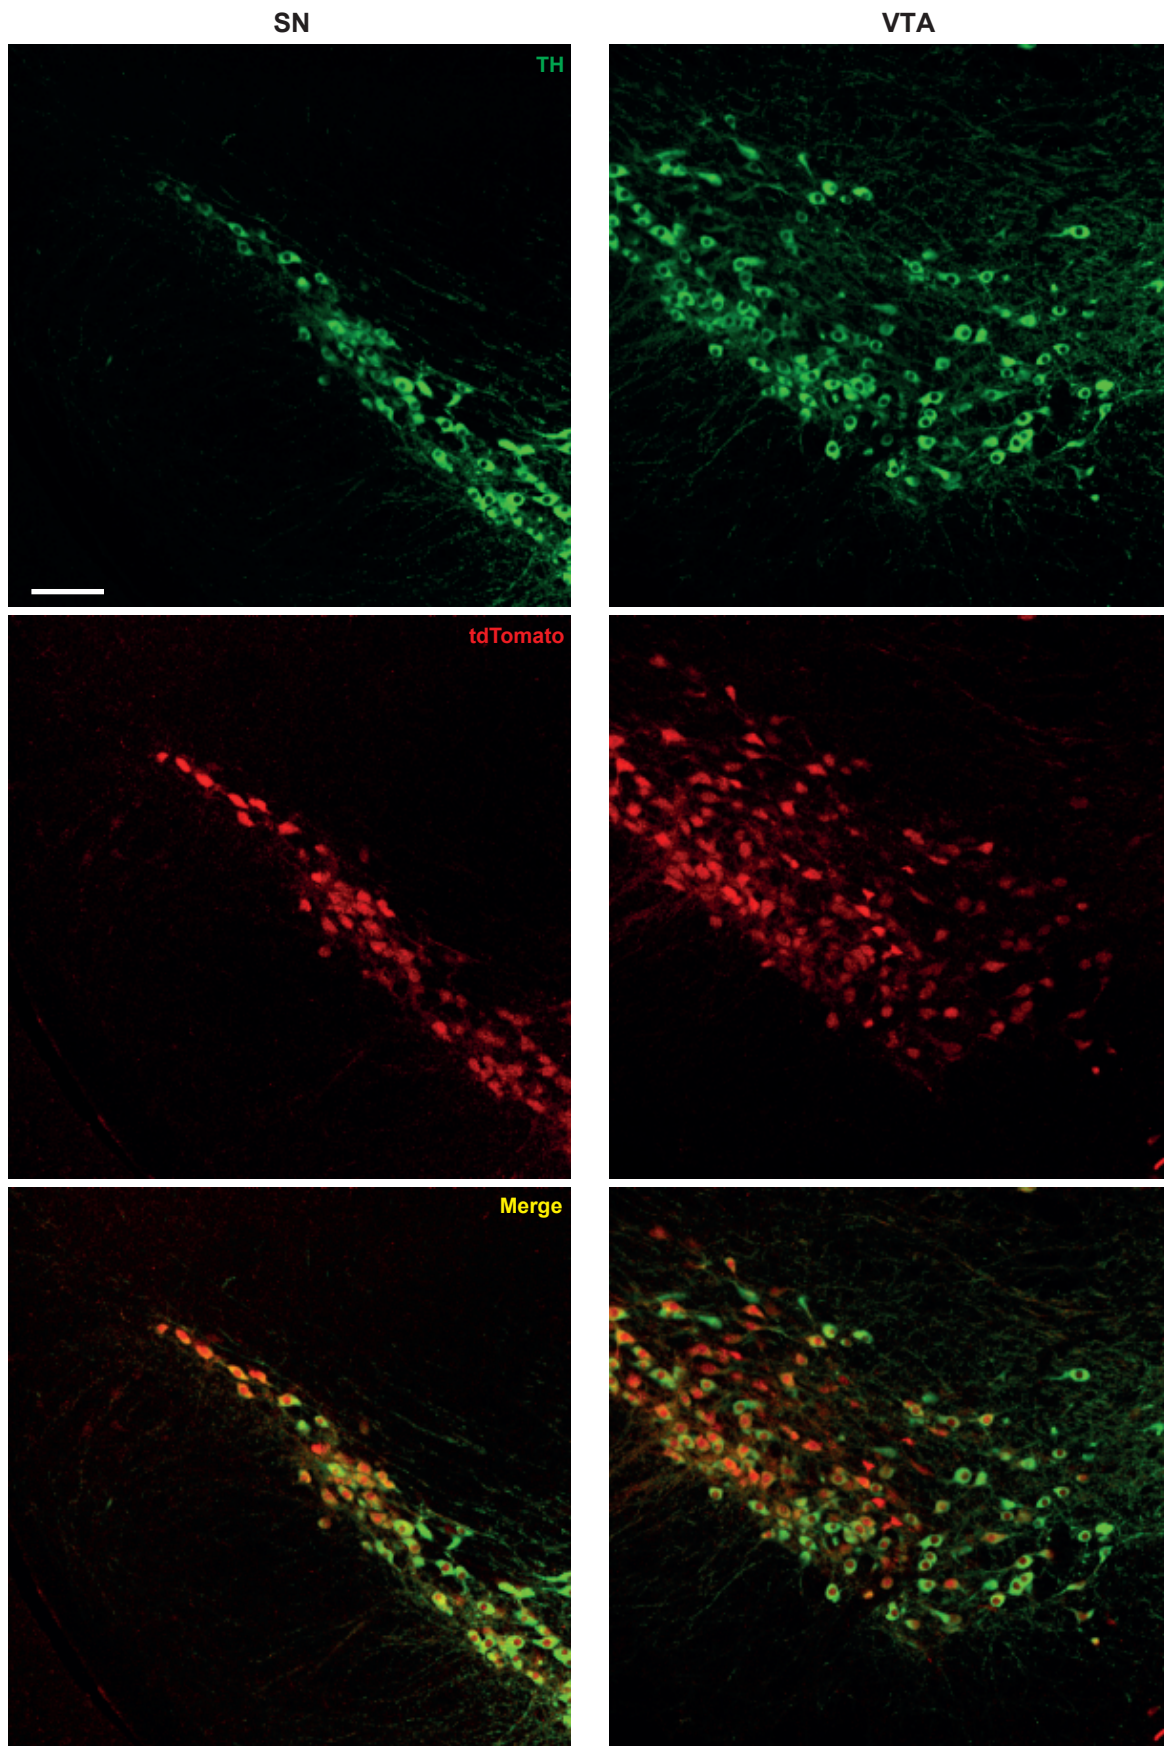

**Fig S2. Co-localization of tdTomato and TH after induction of recombination in  $Dicer^{fl/wt}/tdTomato/CreERT2$  mice.**

Confocal microscopic images of tdTomato fluorescence (red) and TH immunostaining (green) on the ventral midbrain sections from  $Dicer^{fl/wt}/tdTomato/CreERT2$  mice 3 weeks after start of Tam injections. Scale bar, 100  $\mu\text{m}$ .



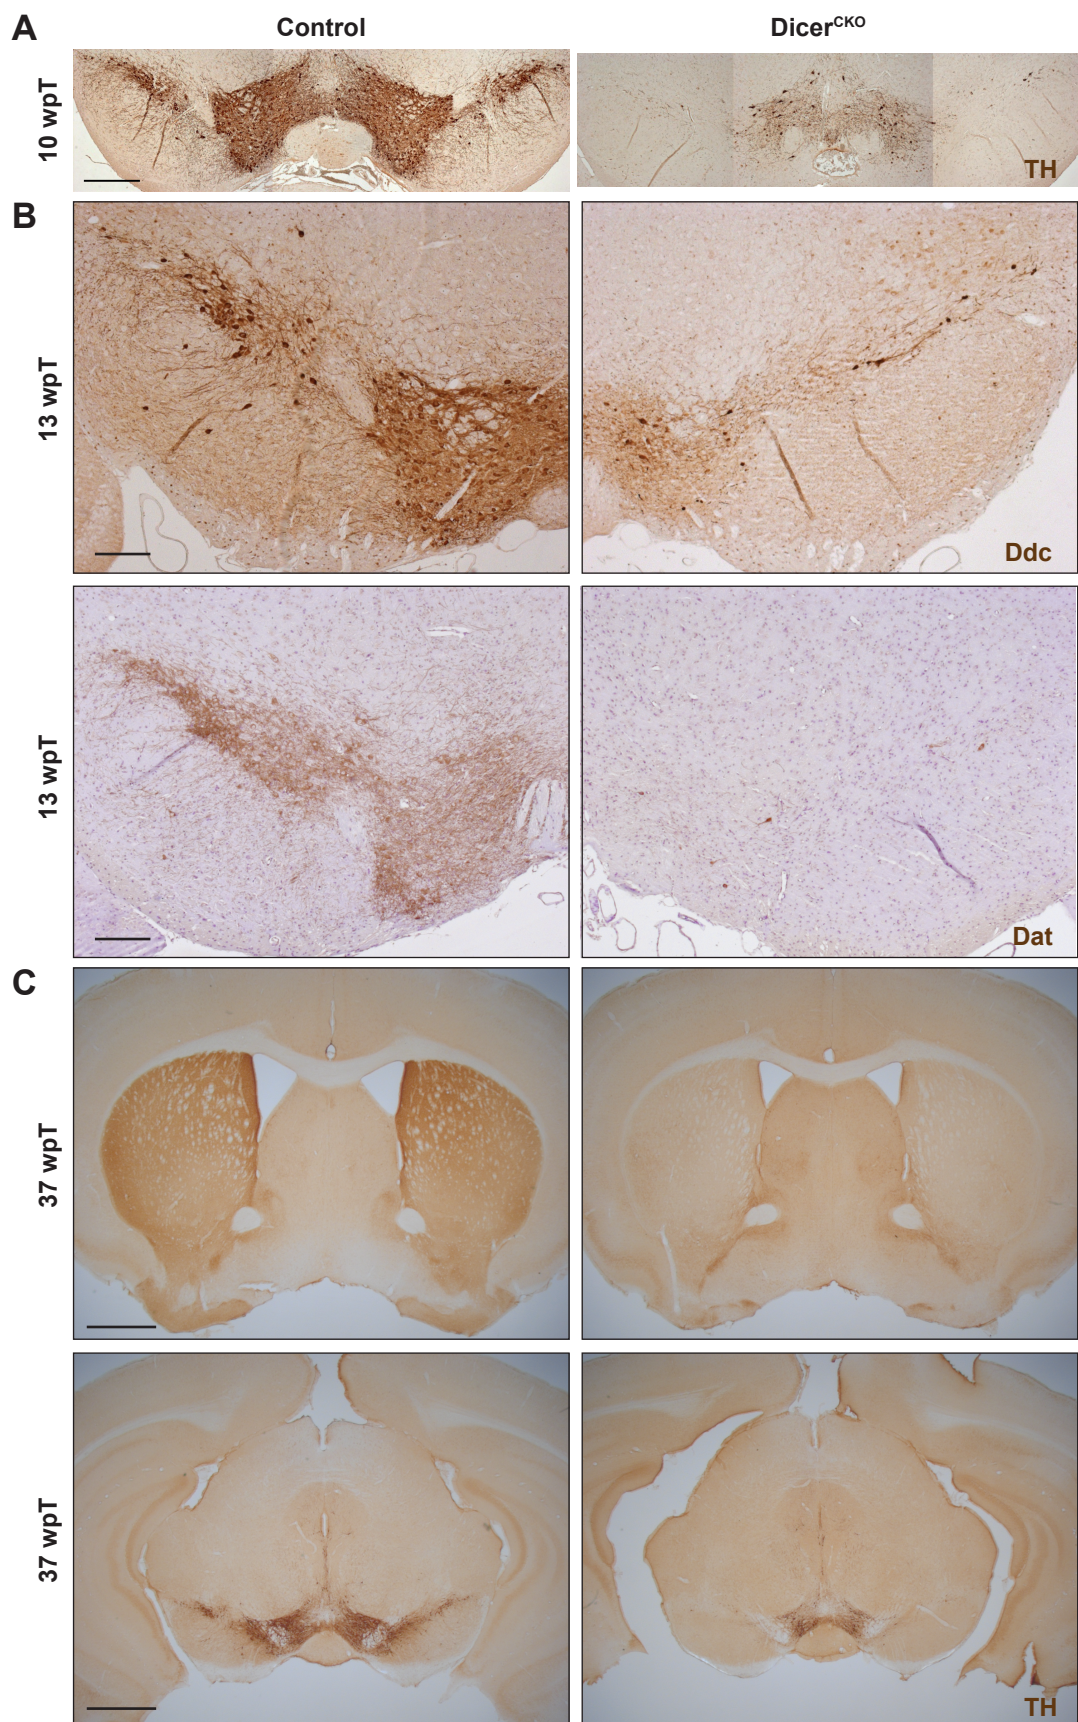

**Fig S3. Degeneration of DA neurons in the SN and VTA of *Dicer*<sup>CKO</sup> mice 10, 13 and 37 weeks after induction of DA neuron-specific CreERT2-driven ablation of *Dicer1*.**

(A) Loss of the ventral midbrain DA neurons at indicated times after the induction of *Dicer1* deletion by Tam injections (wpT, weeks post Tam) visualized by TH immunostaining. Scale bar, 500  $\mu$ m. (B) Loss of dopaminergic neurons in ventral midbrain sections from *Dicer*<sup>CKO</sup> mice 13 weeks after start of Tam injections visualized by immunostaining for DOPA decarboxylase (Ddc, top) or dopamine transporter (Dat, bottom). Scale bar, 200  $\mu$ m. (C) Loss of DA neurons and their striatal projections in *Dicer*<sup>CKO</sup> mice 37 weeks after start of Tam injections visualized by TH immunostaining. Scale bar, 1000  $\mu$ m.



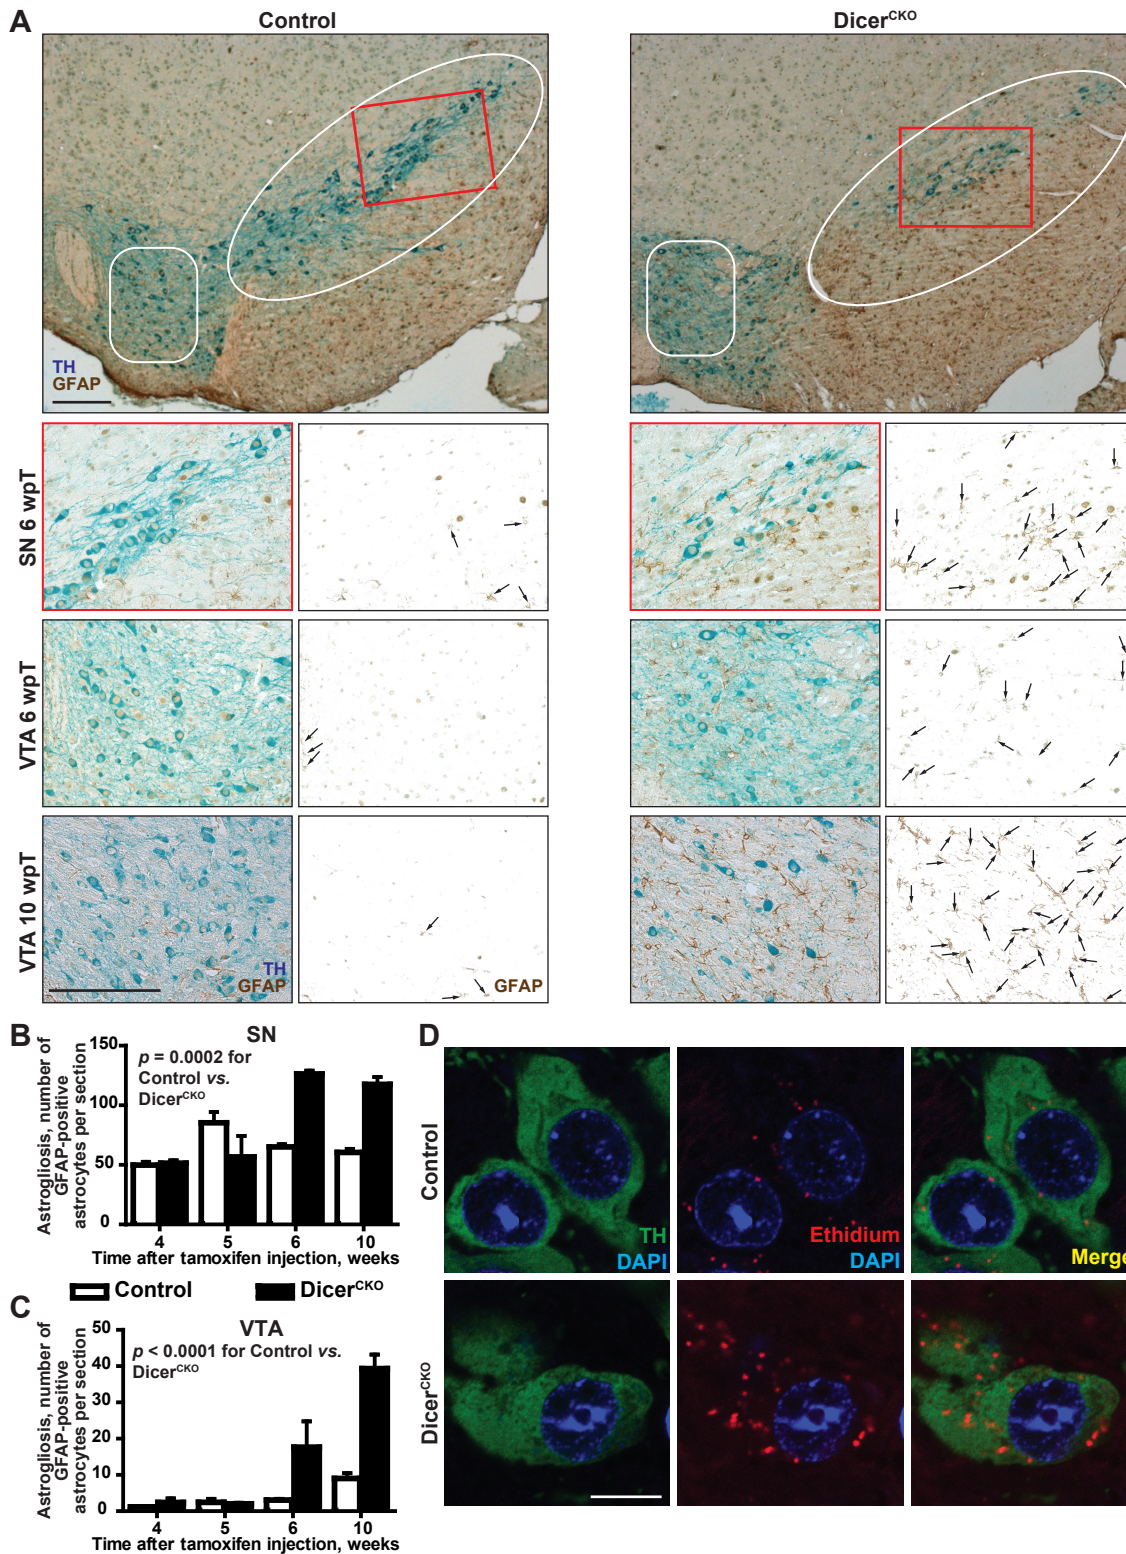

**Fig S4. Astrogliosis and increased oxidative stress in Dicer<sup>CKO</sup> mice.**

(A) Astrogliosis in the substantia nigra (SN) and the ventral tegmental area (VTA) of Dicer<sup>CKO</sup> mice 6 and 10 weeks after start of Tam injections visualized by immunostaining for glial fibrillary acidic protein (Gfap; brown). DA neurons are visualized by TH immunostaining (blue). Areas of the SN and VTA used for astrogliosis quantification are outlined by white ovals or rounded rectangles, respectively. Scale bar, 500  $\mu$ m. (B, C) Counts of Gfap-positive cells in the SN and VTA in control and Dicer<sup>CKO</sup> mice at indicated time points after start of Tam injections.  $n = 3, 4, 4, 4$  for control and  $2, 2, 2, 3$  for Dicer<sup>CKO</sup> mice, respectively, for the indicated time points. Statistical significance was calculated by an unpaired 2-way ANOVA test. (D) The mice received an injection of 200  $\mu$ l dihydroethidium to the tail vein 4 weeks after start of Tam treatment. Increased oxidative stress in DA neurons of Dicer<sup>CKO</sup> mice was visualized by an increase in ethidium fluorescence (red) in TH-immunostained DA neurons (green). Scale bar, 10  $\mu$ m.

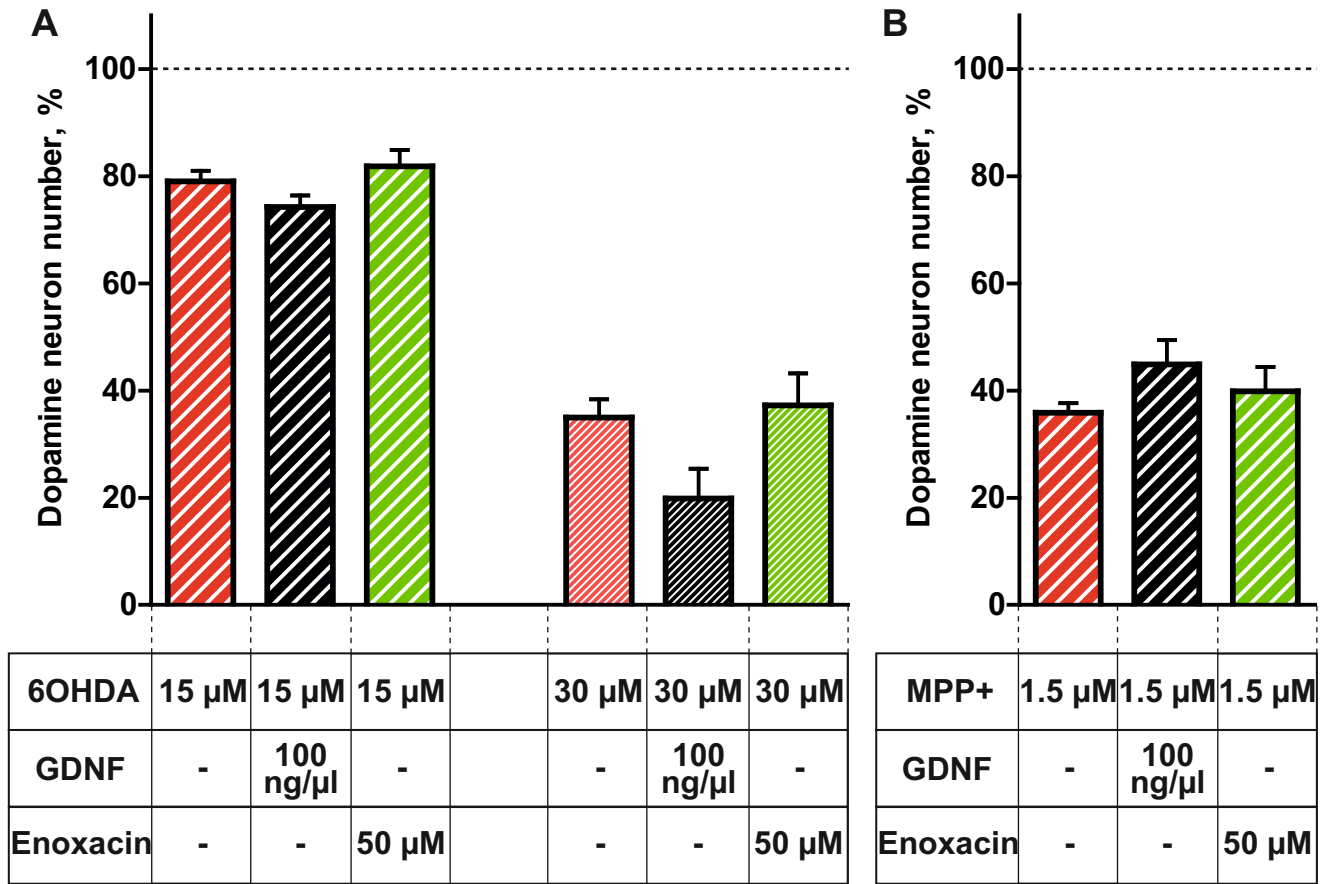

**Fig S5. Enoxacin is not effective in protecting cultured DA neurons from 6OHDA or MPP+.** (A, B) Effect of GDNF and enoxacin on survival of primary ventral midbrain DA neurons treated (starting from day 5 *in vitro*) for 24 hr with 6OHDA (A) or for 48 hr with MPP+ (B) at indicated concentrations. GDNF and enoxacin were added to the cells 6 hr prior to the stressor treatment (n=4-6).
